# Supplementary material for: Assessing and mapping multi-hazard risk susceptibility using a machine learning technique
Source: PubMed Central journal article supplement (PMC7035287; doi:10.1038/s41598-020-60191-3), 2020-02-21
Supplement: 41598_2020_60191_MOESM1_ESM.pdf [file 41598_2020_60191_MOESM1_ESM.pdf]

# Assessing and mapping multi-hazard risk susceptibility using a machine learning technique

**Hamid Reza Pourghasemi<sup>1\*</sup>, Narges Kariminejad<sup>2</sup>, Mahdis Amiri<sup>2</sup>, Mohsen Edalat<sup>3</sup>, Mehrdad Zarafshar<sup>4</sup>, Thomas Blaschke<sup>5</sup>, Artemio Cerda<sup>6</sup>**

<sup>1</sup> Department of Natural Resources and Environmental Engineering, College of Agriculture, Shiraz University, 71441-65186, Shiraz, Iran. Email: [hamidreza.pourghasemi@yahoo.com](mailto:hamidreza.pourghasemi@yahoo.com)

<sup>2</sup> Department of Watershed and Arid Zone Management, Gorgan University of Agricultural Sciences and Natural Resources, Gorgan 49189-434, Iran. Email: [narges.karimi991@gmail.com](mailto:narges.karimi991@gmail.com); [mahdisamiri94@gmail.com](mailto:mahdisamiri94@gmail.com)

<sup>3</sup> Crop Production and Plant Breeding Department, School of Agriculture, Shiraz University, 71441-65186, Shiraz, Iran. Email: [edalat@shirazu.ac.ir](mailto:edalat@shirazu.ac.ir)

<sup>4</sup> Natural Resources Department, Fars Agricultural and Natural Resources Research and Education Center, AREEO, Shiraz, Fars, Iran. Email: [mehrdadzarafshar@gmail.com](mailto:mehrdadzarafshar@gmail.com)

<sup>5</sup> Department of Geoinformatics–Z\_GIS, University of Salzburg, 5020 Salzburg, Austria, [thomas.blaschke@sbg.ac.at](mailto:thomas.blaschke@sbg.ac.at)

<sup>6</sup> Soil Erosion and Degradation Research Group, Department de Geografia, Universitat de València, Spain; [artemio.cerda@uv.es](mailto:artemio.cerda@uv.es)

\*Email: [hr.pourghasemi@shirazu.ac.ir](mailto:hr.pourghasemi@shirazu.ac.ir) (Corresponding authors)

## **Table of content**

**Figure S1.** Location of the study area in Iran

**Figure S2.** Training and validation points of three hazards

**Figure S3.** Maps of effective factors used for in order to danger of natural hazards in the study area

**Figure S4.** Percentages of susceptibility classes of three natural hazards

**Table S1** Geology of the study area

**Table S2** Soil taxonomy of the studied area

**Table S3** Predictive performance of the Random forest model in the validation process

**Figure S1** Location of the study area in Iran

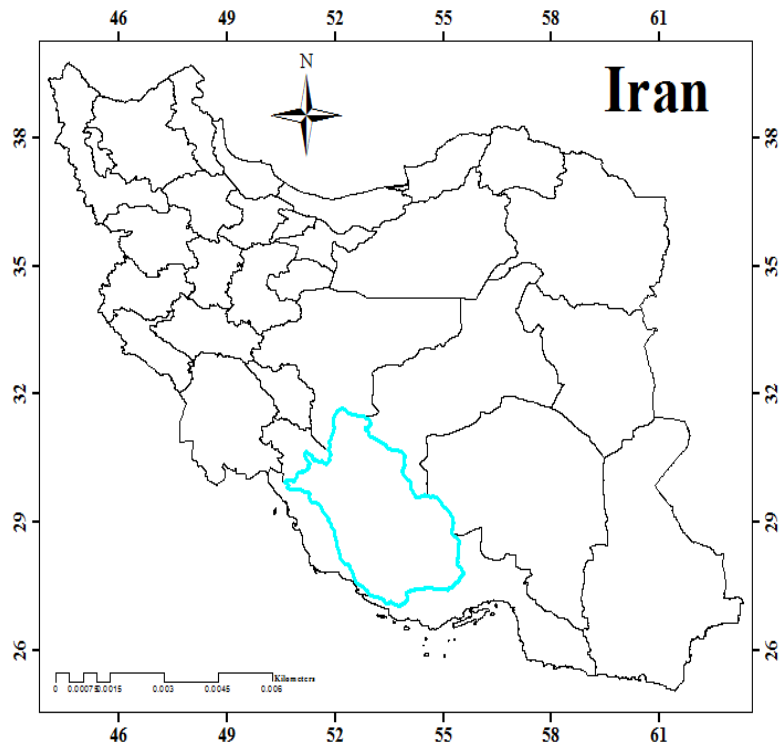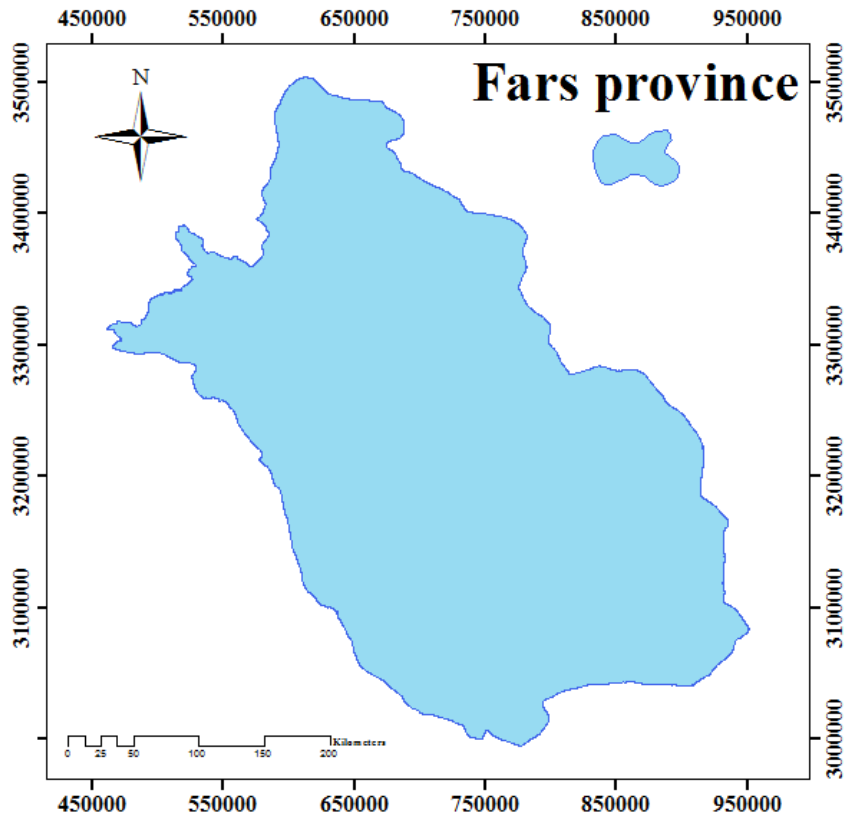

**Figure S2** Training and validation points of three hazards

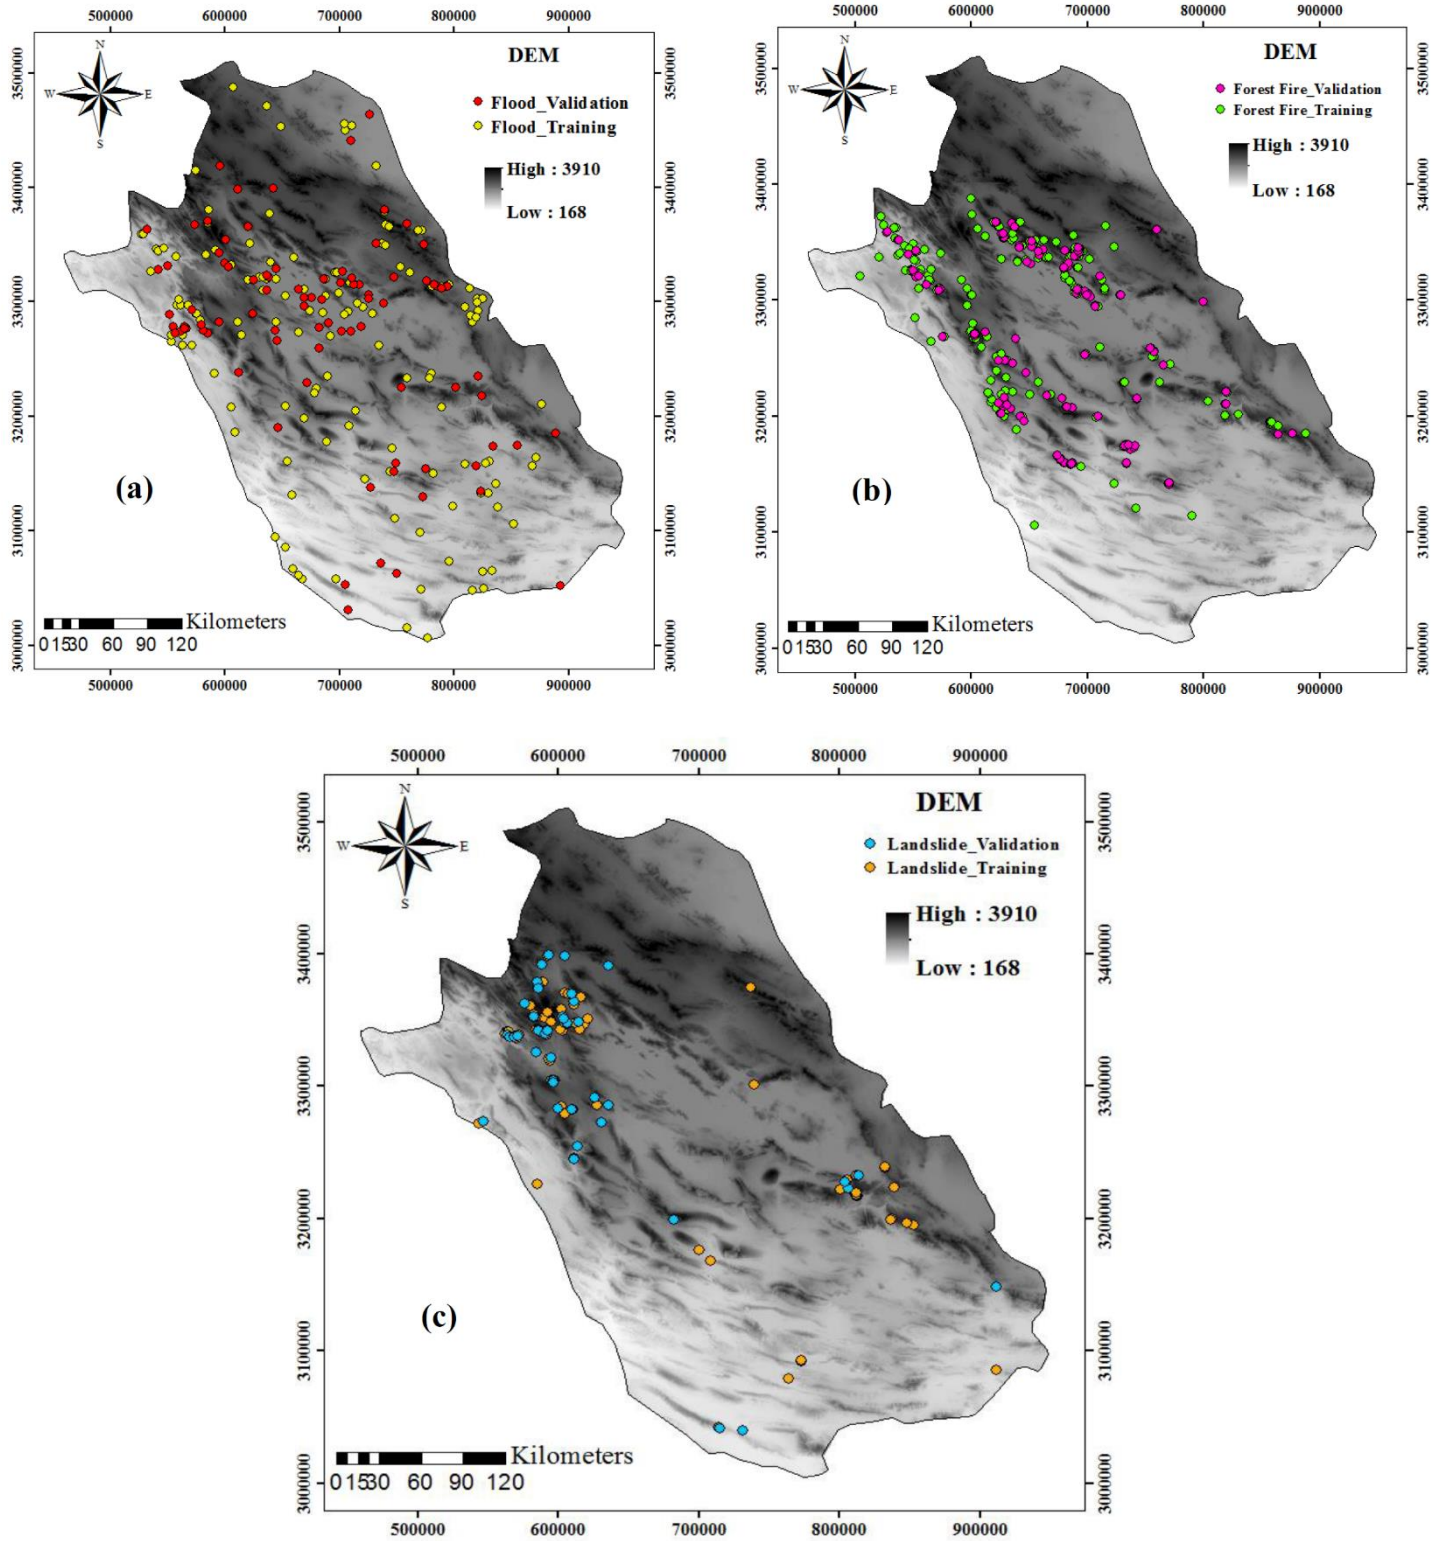

**Figure S3** Maps of effective factors used for in order to danger of natural hazards in the study area

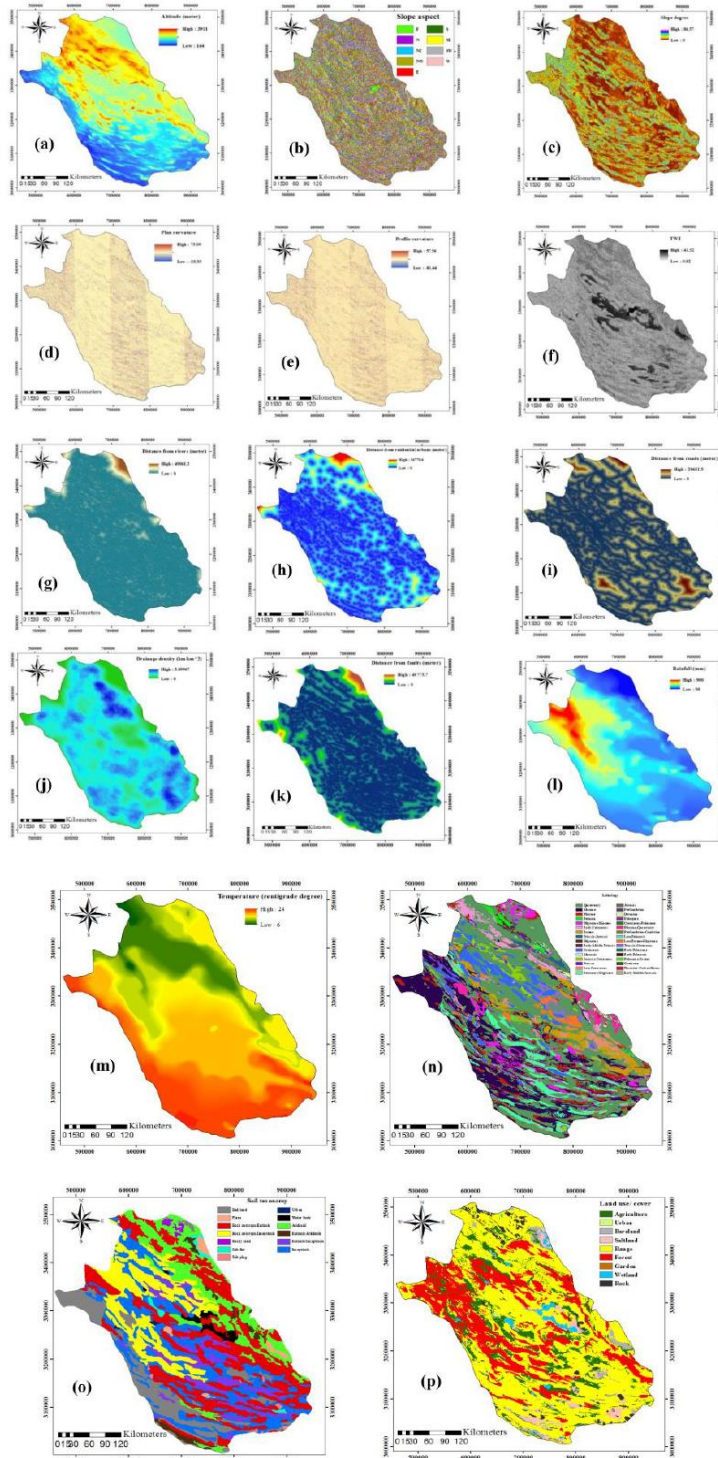

**Figure S4** Percentages of susceptibility classes of three natural hazards

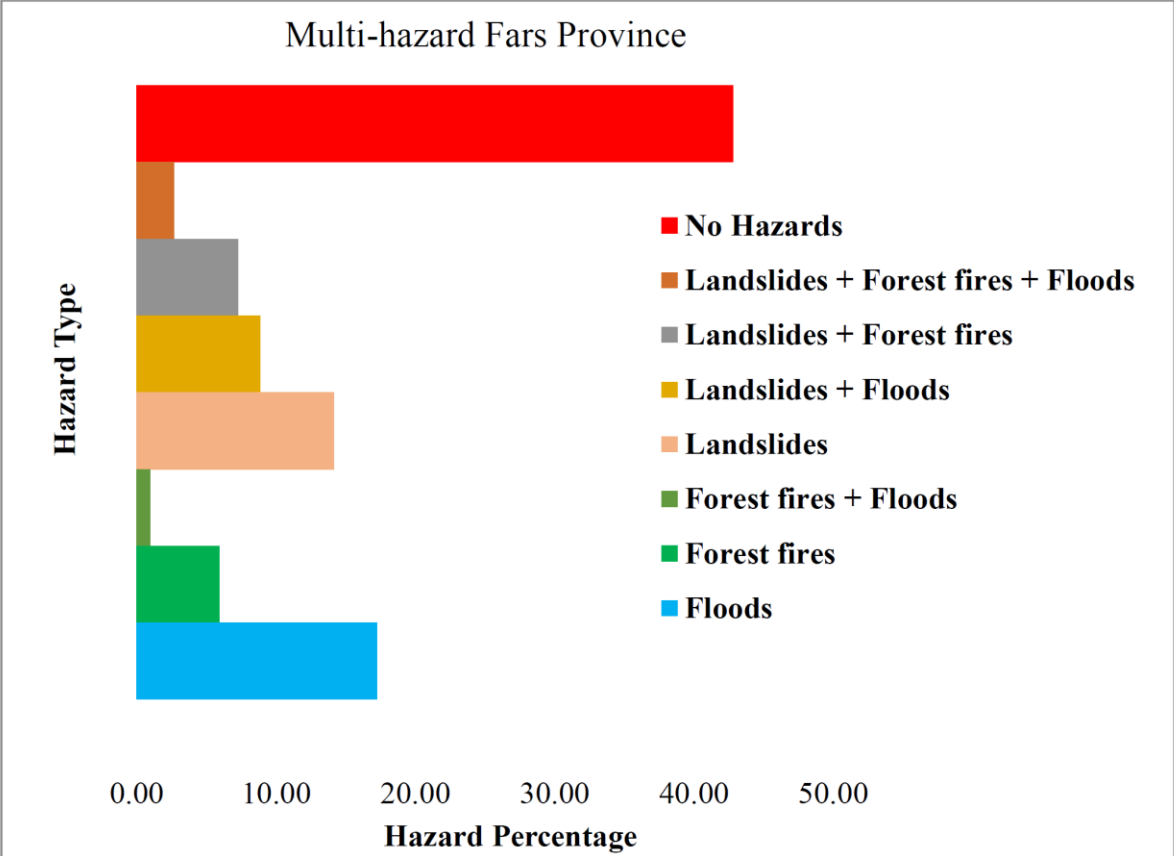

**Table S1.** Geology of the study area

| <b>Formation</b>        | <b>Description</b>                                                                                                                                         | <b>Lithological units</b>   | <b>Age</b>               |
|-------------------------|------------------------------------------------------------------------------------------------------------------------------------------------------------|-----------------------------|--------------------------|
| -                       | Low level pediment fan and valley terrace deposits                                                                                                         | Qft2, Qcf                   | Quaternary               |
| <b>Aghajari, Mishan</b> | Brown to grey, calcareous, feature-forming sandstone and low weathering, gypsum- veined, red marl and siltstone                                            | Mur, MuPlaj,<br>Mmn, MPlfgp | Miocene                  |
| <b>Bakhtyari</b>        | Alternating hard of consolidated, massive, feature forming conglomerate and low -weathering cross - bedded sandstone                                       | Plc, Plbk                   | Pliocene                 |
| <b>Jamal, Dorud</b>     | Massive to thick - bedded, dark - grey, partly reef type limestone and a thick yellow dolomite band in the upper part                                      | Pj, P                       | Permian                  |
| -                       | Marl with intercalations of limestone                                                                                                                      | OMqm, OMql                  | Oligocene-<br>Miocene    |
| <b>Taft</b>             | Thin to medium bedded argillaceous limestone and thick bedded to massive, grey orbitolina bearing limestone                                                | Klsm, Klisol,<br>Klsm, Ktl  | Early Cretaceous         |
| <b>Jahrum</b>           | Grey and brown weathered, massive dolomite, low weathered thin to medium -bedded dolomite and massive, feature forming, buff dolomitic limestone           | Eja, Ek                     | Eocene                   |
| <b>Shemshak</b>         | Dark grey shale and sandstone                                                                                                                              | TRJs                        | Triassic-Jurassic        |
| <b>Lower Red</b>        | Red and green silty, gypsiferous marl, sandstone and gypsum                                                                                                | Olm,s,c                     | Oligocene                |
| <b>Shotori</b>          | Well - bedded, dense, yellow dolomite                                                                                                                      | TRsh                        | Early-Middle<br>Triassic |
| <b>Gurpi</b>            | Bluish grey marl and shale with subordinate thin - bedded argillaceous -limestone                                                                          | Kgu                         | Cretaceous               |
| <b>Naiband</b>          | Sandstone, quartz arenite, shale and fossiliferous limestone                                                                                               | TRn                         | Mesozoic                 |
| -                       | Undivided Khami Group, consist of massive thin - bedded limestone comprising the following formations : Surmeh,Hith Anhydrite, Fahlian, Gadvan and Dariyan | JKkqp,<br>KEpd-gu           | Jurassic-<br>Cretaceous  |

|                                                  |                                                                                                                                                                                                                                                          |               |                       |
|--------------------------------------------------|----------------------------------------------------------------------------------------------------------------------------------------------------------------------------------------------------------------------------------------------------------|---------------|-----------------------|
| <b>Khamehkat and Neyriz</b>                      | Thin to medium - bedded, dark grey dolomite ; thin - bedded dolomite, greenish shale and thin - bedded argillaceous limestone                                                                                                                            | TRe1, TRkk-nz | Triassic              |
| <b>Tarbur</b>                                    | Massive, shelly, cliff - forming partly anhydritic limestone                                                                                                                                                                                             | Ktb           | Late Cretaceous       |
| -                                                | Undivided Asmari and Jahrum Formation, regardless to the disconformity separates them                                                                                                                                                                    | EOas-ja       | Paleocene-Oligocene   |
| <b>Baghamshah</b>                                | Pale - green silty shale and sandstone                                                                                                                                                                                                                   | Jbg, Jf       | Jurassic              |
| <b>Amphibolite Facies</b>                        | Medium-grade, regional metamorphic rocks                                                                                                                                                                                                                 | pCmt1, pCmt2  | Pre Cambrian          |
| <b>Shidhtu</b>                                   | Alternation of shale, marl and fossiliferous limestone, locally with intercalations of quartz arenite                                                                                                                                                    | Dsh           | Devonian              |
| <b>Pabdeh</b>                                    | Blue and purple shale and marl interbedded with the argillaceous limestone                                                                                                                                                                               | PeEpd         | Paleogene             |
| <b>Amiran</b>                                    | Dark olive - brown, low weathered siltstone and sandstone with local development of chert conglomerates and shelly limestone                                                                                                                             | KPeam         | Cretaceous-Paleocene  |
| -                                                | Fluvial conglomerate, Piedmont conglomerate and sandstone                                                                                                                                                                                                | PIQc          | Pliocene-Quaternary   |
| -                                                | Rock salt, gypsum & blocks of contorted masses of sedimentary material such as black laminated fetid limestone, brown cherty dolomite, red sandstone & variegated shale in association with igneous rocks such as diabase, basalt, rhyolite and trachyte | pC-Ch         | Pre Cambrian-Cambrian |
| -                                                | Granite                                                                                                                                                                                                                                                  | PZ2gr         | Late Paleozoic        |
| -                                                | -                                                                                                                                                                                                                                                        | Lake          | Late Eocene-Oligocene |
| <b>Kerman and Neyzar Radiolarites</b>            | Purple and red thin - bedded radiolarian chert with intercalations of neritic and pelagic limestone                                                                                                                                                      | TRKurl, pd    | Triassic-Cretaceous   |
| <b>Barreh Koshan Complex and Rutchan Complex</b> | Gneiss, anatectic granite, amphibolite, kyanite, staurolite schist, quartzite and minor marble                                                                                                                                                           | Pz1mt         | Early Paleocene       |
| -                                                | Gneiss and anatectic granite                                                                                                                                                                                                                             | Pz1gn         | Early Paleozoic       |



|                       |                                                                                              |        |                        |
|-----------------------|----------------------------------------------------------------------------------------------|--------|------------------------|
| <b>Sachun</b>         | Pale red marl, marlstone, limestone, gypsum and dolomite                                     | PeEsa  | Paleocene-Eocene       |
| <b>Lalun</b>          | Dark red meddium - grained arkosic to subarkosic sandstone and micaceous siltstone           | Cl     | Cambrian               |
| <b>Sargaz Complex</b> | Mica schist, green schist, graphite schist, black pyyllit and minor marble                   | DC2met | Devonian-Carboniferous |
| <b>Surmeh</b>         | Thick - bedded to massive dolomitic limestone, thin - bedded argillaceous limestone and marl | Jsm    | Early Middle Jurassic  |

**Table S2.** Soil taxonomy of the studied area

| <b>Soil Taxonomy</b>             | <b>Description</b>                                                                                                                                                                                                                                                                                          |
|----------------------------------|-------------------------------------------------------------------------------------------------------------------------------------------------------------------------------------------------------------------------------------------------------------------------------------------------------------|
| <b>Bad land</b>                  | Sundry lands when soil erosion increases its depth and width, becomes a bad land, that is one of the nine physiographic units                                                                                                                                                                               |
| <b>Playa</b>                     | The shallow lakes located in arid and semi-arid soils, where they are clay and silt, is a barrier to water penetration. It can either be water or not, and if it contains water, it is caused by precipitation and the water is salty so that it salt is extracted                                          |
| <b>Rock outcrops/Entisols</b>    | The outcrop is destroyed due to the erosion of all existing materials or soil on the rock and the rock has been exposed./ Immersive soils that are just beginning to evolve, most of them, like the C horizon and bedrock, can also have a A horizon. but the rock outcrops properties are dominant in them |
| <b>Rock outcrops/Inceptisols</b> | The outcrop is destroyed due to the erosion of all existing materials or soil on the rock and the rock has been exposed./ Young soils are the most abundant soils in the world, the soils that begin to form the horizon and have a cosmic horizon, but t the rock outcrops properties are dominant in them |
| <b>Rocky land</b>                | Rocky lands usually contain rocks can be angled or non-angular. If the rocks are displaced by water, they are circular and without angle, but if they are not caused by a force, for example, due to the force of gravity and on the basis of weight, they will flow from the mountain. Angle Had been      |
| <b>Salt flat</b>                 | Salt shells are formed in flat lands                                                                                                                                                                                                                                                                        |
| <b>Salt plug</b>                 | Holes or hills or salt domes                                                                                                                                                                                                                                                                                |
| <b>Urban</b>                     | Urban land affected by human construction                                                                                                                                                                                                                                                                   |
| <b>Water body</b>                | There is a water horizon and the conditions are such that it encloses the water in the area                                                                                                                                                                                                                 |

|                           |                                                                                                                            |
|---------------------------|----------------------------------------------------------------------------------------------------------------------------|
| <b>Aridisoil</b>          | The soils are arid and semi-arid regions and have a calcic horizon, natric, and gypsic horizons                            |
| <b>Entisols/Aridisols</b> | Soils that have both Aridisols and Entisols properties, but Entisols properties (immature soils) dominant                  |
| <b>Entisols/ Entisols</b> | The soil has Entisols region and Entisols propertise, but Entisols propertises is more dominant in the region              |
| <b>Inceptisols</b>        | Young soils are the most abundant soils in the world, the soils that begin to form the B horizon and have a Cambic horizon |

**Table S3.** Predictive performance of the Random forest model in the validation process

| <b>RF model</b>    | <b>Area</b> | <b>Standard error</b> | <b>Asymptotic significant</b> | <b>Asymptotic 95% Confidence Interval</b> |                    |
|--------------------|-------------|-----------------------|-------------------------------|-------------------------------------------|--------------------|
|                    |             |                       |                               | <b>Lower bound</b>                        | <b>Upper bound</b> |
| <b>Flood</b>       | 0.834       | .028                  | .000                          | .780                                      | 0.888              |
| <b>Forest fire</b> | 0.943       | .016                  | .000                          | .912                                      | 0.974              |
| <b>Landslide</b>   | 0.939       | .023                  | .000                          | .893                                      | .985               |
